# Supplementary material
Source: MDPI journal article supplement (https://www.mdpi.com/2035-8377/15/3/49)
Supplement: s1 [file s1]

**Table S1.** Parameters of behavioral reactions of female WT and 5xFAD mice in the Open field test day after sleep deprivation modeling

*A. 7-9 months*

| Experimental group | Acts of defecation | Acts of urination | Grooming, s |         | Number of upright postures | Number of squares passed in the arena |           | Time spent in the center of the arena, s | Number of peeks in holes |
|--------------------|--------------------|-------------------|-------------|---------|----------------------------|---------------------------------------|-----------|------------------------------------------|--------------------------|
|                    |                    |                   | Short       | Long    |                            | Periphery                             | Centre    |                                          |                          |
| Intact WT          | 0±0                | 0.6±0.3           | 4±2.1       | 1±1     | 3±1.5                      | 30.3±21.1                             | 17.3±13.9 | 129.6±87.1                               | 21.6±8.8                 |
| Intact 5xFAD       | 0±0                | 2±0.7             | 3±1.7       | 1.6±0.8 | 0.6±0.6                    | 61±7.9                                | 33.3±4.9  | 99.6±3.4                                 | 17.3±6.6                 |
| Control WT         | 0.5±0.3            | 0.75±0.75         | 2.5±0.9     | 1±0.4   | 3±0.4                      | 72.5±8.1                              | 32.5±3.9  | 70.7±13.4                                | 32±2.5                   |
| Control 5xFAD      | 0±0                | 0.6±0.3           | 6.6±4.8     | 3.3±2.4 | <b>5.6±0.8*</b>            | 62±6.5                                | 29.6±2    | 68±4                                     | 18±2.3                   |
| SD WT              | 0±0                | 0.4±0.2           | 2.2±2.2     | 0.4±0.2 | 1.8±0.7                    | 47.2±2.8                              | 16.4±4.9  | 88.4±21.1                                | 34±4.4                   |
| SD 5xFAD           | 0±0                | 1±0.4             | 9.3±2.4     | 2.8±1.2 | 2.5±0.8                    | 49.2±11.3                             | 16.8±3.5  | 139.3±26.5                               | 16.6±4.6                 |

*B. ≤12 months*

| Experimental group | Acts of defecation | Acts of urination | Grooming, s |         | Number of upright postures | Number of squares passed in the arena |          | Time spent in the center of the arena, s | Number of peeks in holes |
|--------------------|--------------------|-------------------|-------------|---------|----------------------------|---------------------------------------|----------|------------------------------------------|--------------------------|
|                    |                    |                   | Short       | Long    |                            | Periphery                             | Centre   |                                          |                          |
| Intact WT          | 0±3                | 1.6±0.3           | 3.6±2.7     | 0.3±0.3 | 0.3±0.3                    | 19.3±8.7                              | 14.3±3.8 | 139.3±63.6                               | 14.6±3.5                 |
| Intact 5xFAD       | 0±0                | 2.3±0.8           | 1.6±1.6     | 0.3±0.3 | 2.3±0.6                    | 53.6±9.6                              | 21.6±5.7 | 62.6±21.6                                | 16.6±5.8                 |
| Control WT         | 0.1±0.1            | 1±0.5             | 4.9±2.4     | 1±0.4   | 1.25±0.5                   | 52±8                                  | 18.9±4.4 | 67±14.7                                  | 23.1±3.9                 |
| Control 5xFAD      | 0±0                | 1.3±0.3           | 4.3±2.9     | 1.3±1.3 | 1±1                        | 55.6±7.7                              | 15±2.5   | 64±18.3                                  | 22.6±3.7                 |
| SD WT              | 0±0                | 1.9±0.4           | 5±1.6       | 1.2±0.6 | 2.9±0.9                    | 59.8±8                                | 20.5±5.6 | 72.9±19.4                                | 24.9±4.8                 |
| SD 5xFAD           | 0±0                | 0.6±0.3           | 2±2         | 0.6±0.6 | 3±2                        | 70.3±16.3                             | 14.6±2.6 | 28.6±5                                   | 25.6±5.2                 |

\* - versus "Intact", ANOVA test, p≤0.05

**Table S2.** Main parameters of the brain mitochondrial functional activity of female WT and 5xFAD mice after sleep deprivation modeling, pmol/(s\*mL)

*A. 7-9 months*

| Experimental group | Basal oxygen consumption rate (V4) | ADP-stimulated respiration (V3) | Inhibition of NADH dehydrogenase (inhibition of respiratory chain complex I) | Activation of an alternate pathway for the respiratory chain (activation of respiratory chain complex II) | Proton leakage |
|--------------------|------------------------------------|---------------------------------|------------------------------------------------------------------------------|-----------------------------------------------------------------------------------------------------------|----------------|
| Intact WT          | 51.6±4.4                           | 228.3±17.9                      | 13.6±3.3                                                                     | 192.3±14.5                                                                                                | 58.6±3.4       |
| Intact 5xFAD       | 52±3.6                             | 241±11.5                        | 19.6±1.8                                                                     | 214.3±10.7                                                                                                | 66±3.8         |
| Control WT         | 70.6±14.8                          | 242.2±43.1                      | 25.8±3.7                                                                     | 199.2±24.2                                                                                                | 98.6±18.2      |
| Control 5xFAD      | 65.8±17.2                          | 210.8±29.8                      | 23.2±4.2                                                                     | 193±24.1                                                                                                  | 91.6±21.5      |
| SD WT              | 70.3±10                            | 217.8±9.7                       | 20.8±3.1                                                                     | 182.2±8.3                                                                                                 | 98.6±8.5       |
| SD 5xFAD           | 78.8±15.9                          | 227.8±18.4                      | 23.6±3.7                                                                     | 208.6±16.3                                                                                                | 104.8±16.8     |

*B. ≤12 months*

| Experimental group | Basal oxygen consumption rate (V4) | ADP-stimulated respiration (V3) | Inhibition of NADH dehydrogenase (inhibition of respiratory chain complex I) | Activation of an alternate pathway for the respiratory chain (activation of respiratory chain complex II) | Proton leakage |
|--------------------|------------------------------------|---------------------------------|------------------------------------------------------------------------------|-----------------------------------------------------------------------------------------------------------|----------------|
| Intact WT          | 44.6±4.8                           | 83±4.4                          | 11.3±2                                                                       | 100±17.7                                                                                                  | 43±6.5         |
| Intact 5xFAD       | 68±20.4                            | 160±48.9                        | 14.3±2.4                                                                     | 149.3±45.2                                                                                                | 72.6±27.1      |
| Control WT         | 80.3±12.4                          | 205.3±32.4                      | 17.1±3.7                                                                     | 185±30.7                                                                                                  | 97.8±19.2      |
| Control 5xFAD      | 54±2.5                             | 179.6±7.3                       | 9±1                                                                          | 116±6                                                                                                     | 45±4.9         |
| SD WT              | 68.8±8.6                           | 154.3±24.3                      | 15.3±2.2                                                                     | 144.3±20.7                                                                                                | 80.1±11.3      |
| SD 5xFAD           | 67.7±5.3                           | 225±25.3                        | 16.6±2.8                                                                     | 180±18.8                                                                                                  | 76.7±6.4       |

No statistical differences between groups,  $p > 0.05$ , ANOVA test
